# Supplementary material for: Cone-shaped titanate immobilized on polyacrylonitrile nanofibers: hierarchical architecture for effective photocatalytic activity
Source: Royal Society of Chemistry journal article supplement (doi:10.1039/c9dt04934g), 2020-01-01
Supplement: c9dt04934g1.pdf [file c9dt04934g1.pdf]

## Supplementary Materials

### Cone-like titanate immobilized on polyacrylonitrile nanofibers: hierarchical architecture for effective photocatalytic activity

Mingyue Zhu, Chuanxiang Qin,\* Jian-jun Wang, Jun Sun, Lixing Dai\*

College of Chemistry, Chemical Engineering and Materials Science, Soochow University,

Suzhou 215123, China

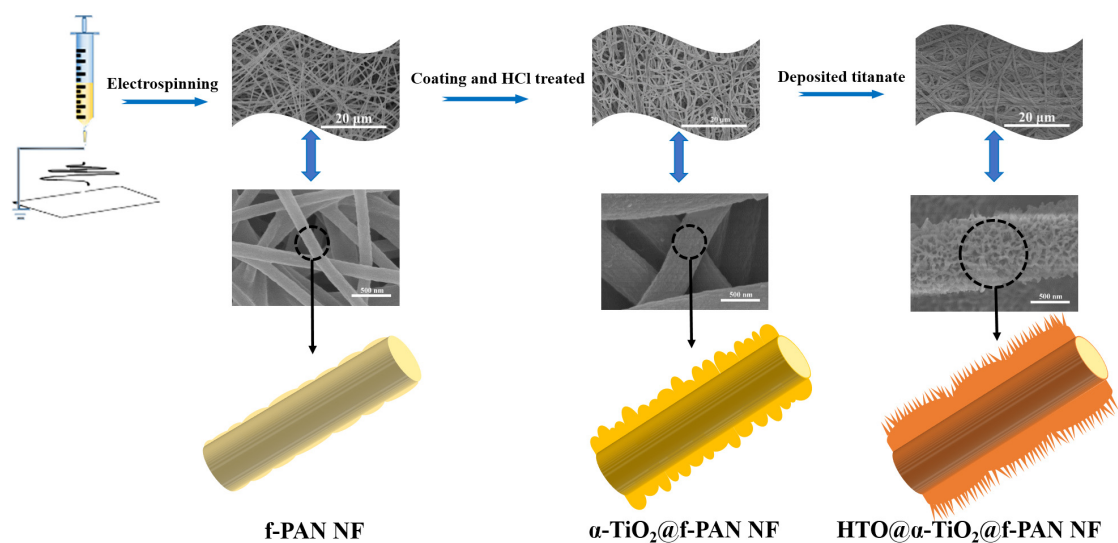

**Figure S1** The scheme of fabrication process for the HTO@ $\alpha$ -TiO<sub>2</sub>@f-PAN NF photocatalysts.

\* Corresponding author: Dr. C. Qin, Prof. L. Dai

E-mail address: [qinchuanxiang@suda.edu.cn](mailto:qinchuanxiang@suda.edu.cn), [dailixing@suda.edu.cn](mailto:dailixing@suda.edu.cn)

The spectrum of LED light source (Fig. S2) in our experiment system was investigated by USB4000 optical fiber UV-VIS spectrometer, the region between 300 nm-400 nm is about 3.5 %, while that between 400 nm-888 nm is about 96.5 %.

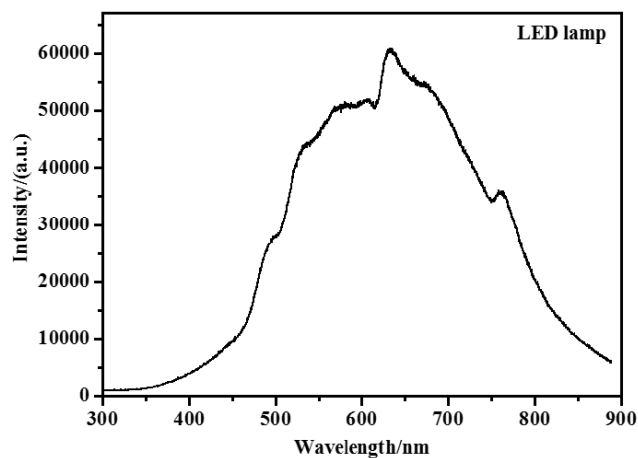

Figure S2 Relative spectral radiance of LED light source.

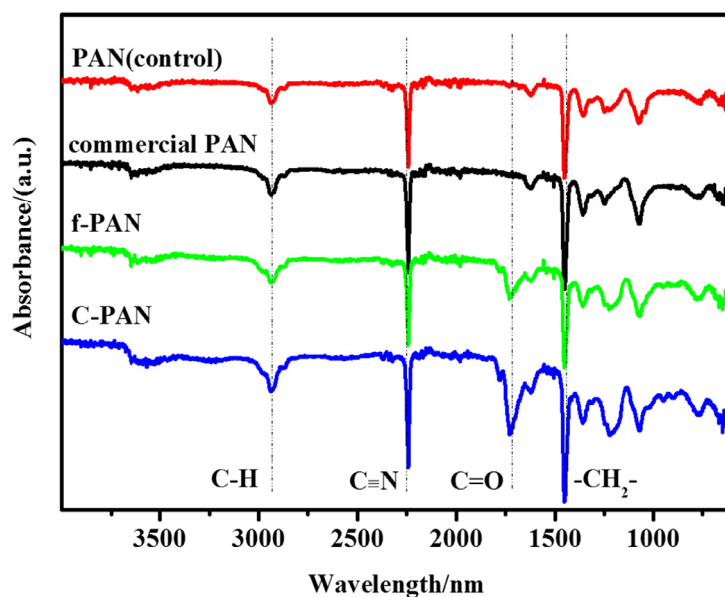

Figure S3 FTIR spectra of different samples.

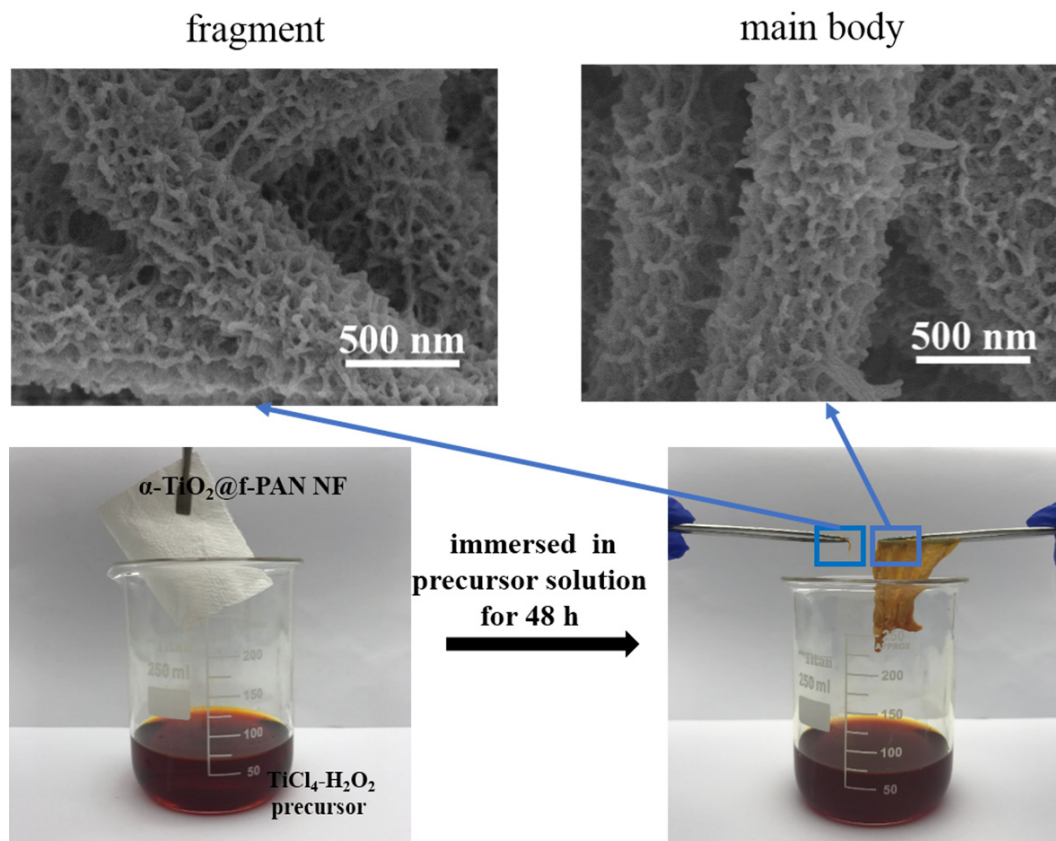

**Figure S4** Photographs of the preparation process for 48-HTO@ $\alpha$ -TiO<sub>2</sub>@f-PAN NF and SEM images of different part of 48-HTO@ $\alpha$ -TiO<sub>2</sub>@f-PAN NF sample.

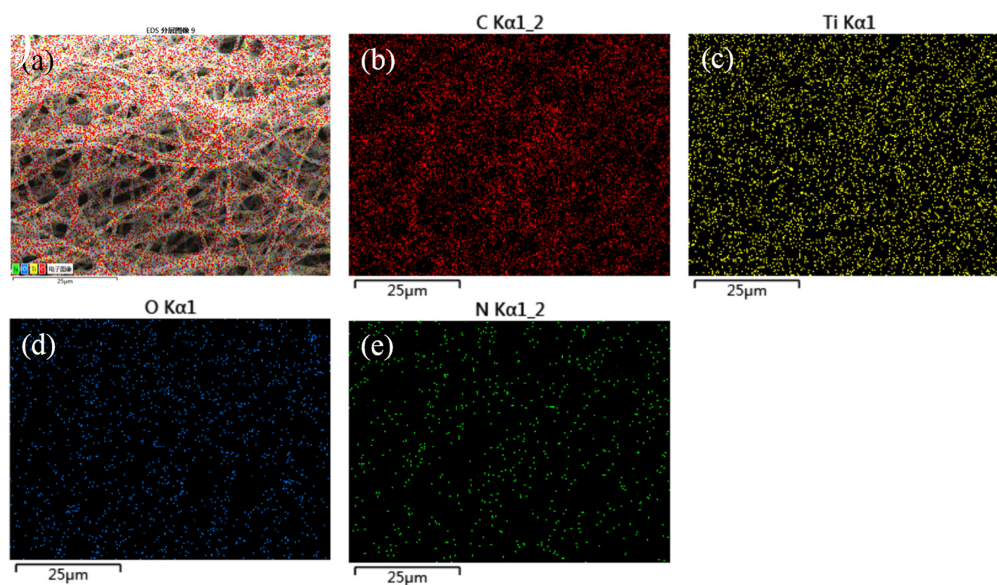

**Figure S5** The SEM element mapping images of S-HTO@ $\alpha$ -TiO<sub>2</sub>@f-PAN NF.

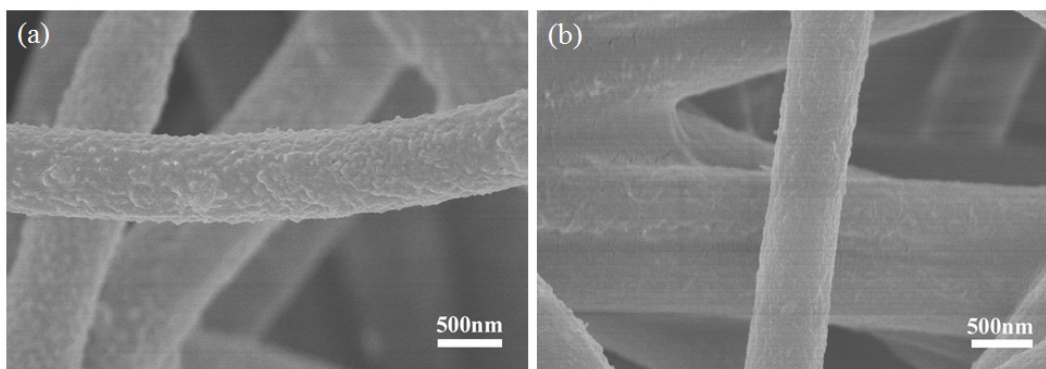

**Figure S6** SEM images of (a) 36-HTO@ $\alpha$ -TiO<sub>2</sub>@f-PAN NF prepared without cyanuric acid and (b) HTO@f-PAN NF prepared without  $\alpha$ -TiO<sub>2</sub> layer.

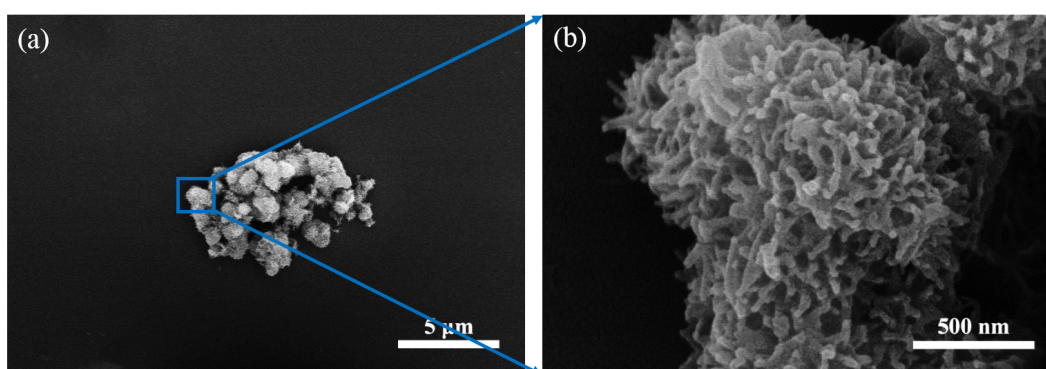

**Figure S7** SEM images using different magnification of titanate powder deposited for 36h in the peroxide precursor with no fiber carriers.

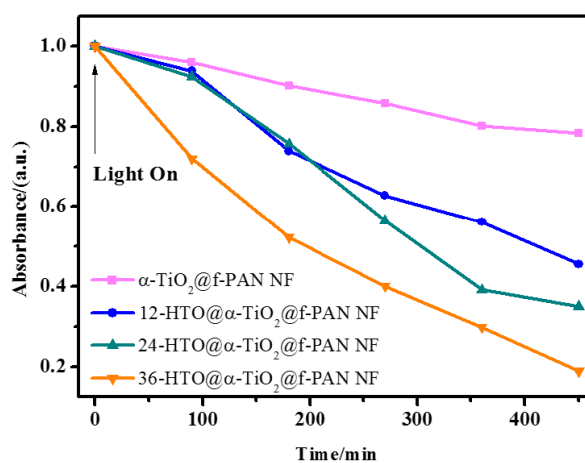

**Figure S8** The absorbance ( $\lambda=554$  nm) of RhB aqueous solution when using HTO@ $\alpha$ -TiO<sub>2</sub>@f-PAN NF samples under LED light irradiation.

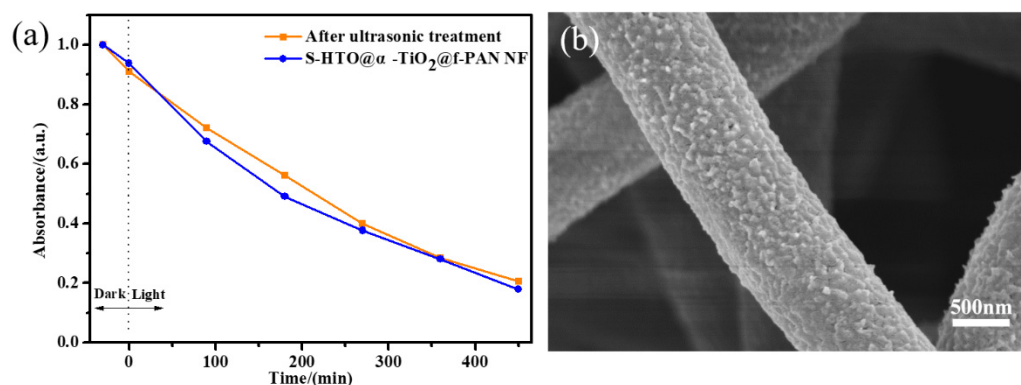

**Figure S9** (a) The absorbance of RhB ( $\lambda=554\text{nm}$ ) under LED over S-HTO@ $\alpha$ -TiO<sub>2</sub>@f-PAN NF before and after ultrasonic treatment and (b) SEM image of HTO@ $\alpha$ -TiO<sub>2</sub>@f-PAN NF after ultrasonic treatment.

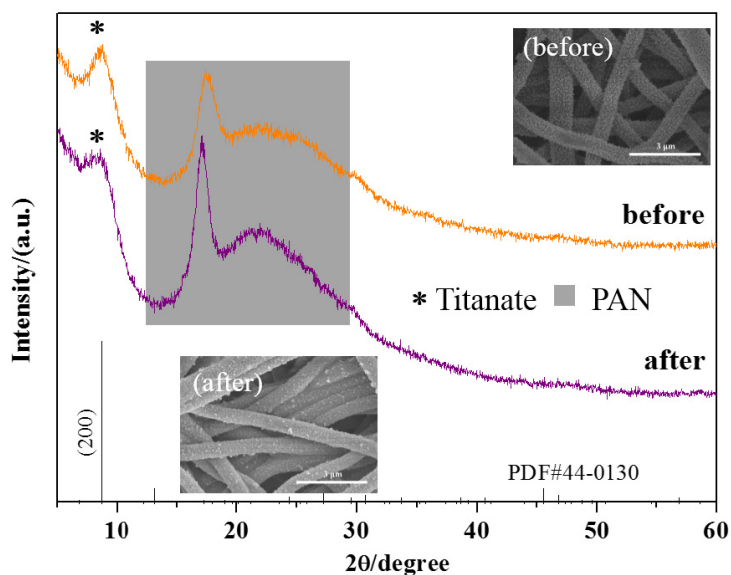

**Figure S10** XRD patterns of S-HTO@ $\alpha$ -TiO<sub>2</sub>@f-PAN NF after five times photocatalytic degradation of RhB aqueous solution and inset SEM images of S-HTO@ $\alpha$ -TiO<sub>2</sub>@f-PAN NF before and after photocatalytic degradation of RhB.

The photocatalytic activity of tetracycline hydrochloride (TC-HCl), a colorless organic pollutant, was also tested here. In these typical experiments, 0.06 g S-HTO@ $\alpha$ -TiO<sub>2</sub>@f-PAN NF composite photocatalyst was dispersed in the reactor containing 100 mL TC-HCl aqueous solution of different concentration (100mg/L, 50mg/L, 25mg/L). The removal rate of organic pollutant was determined by UV-vis spectrophotometer (TU-1900, China) at the characteristic wavelength of 357 nm. [S1-S3]

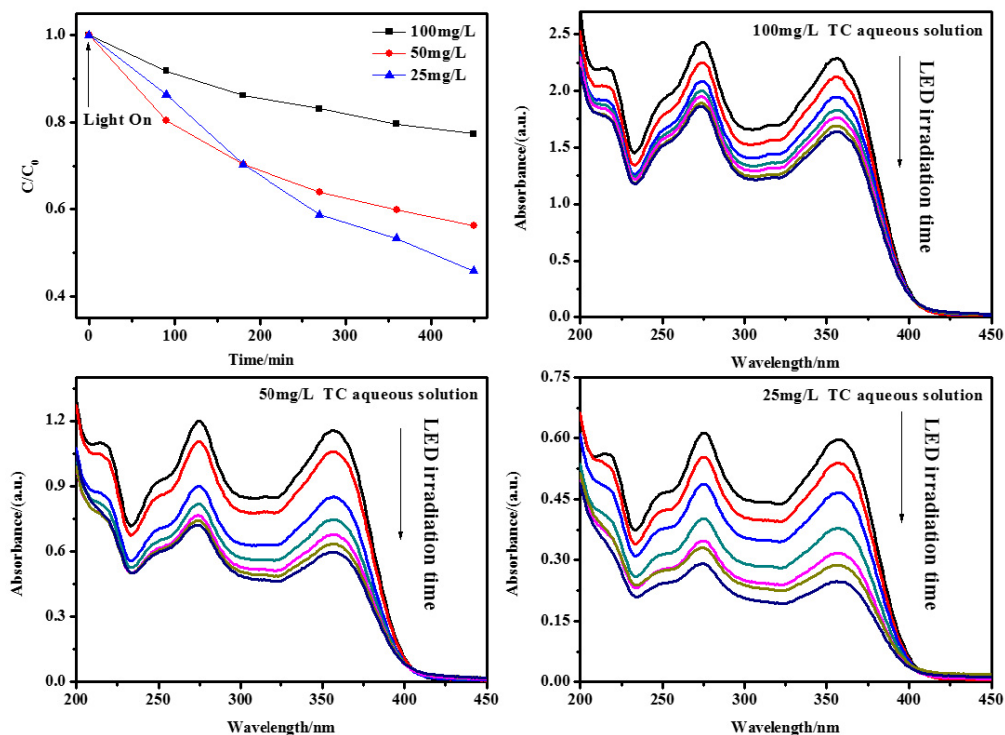

**Figure S11** Concentration variation of TC-HCl aqueous solution under LED light irradiation in presence of S-HTO@ $\alpha$ -TiO<sub>2</sub>@f-PAN NF composite photocatalyst.

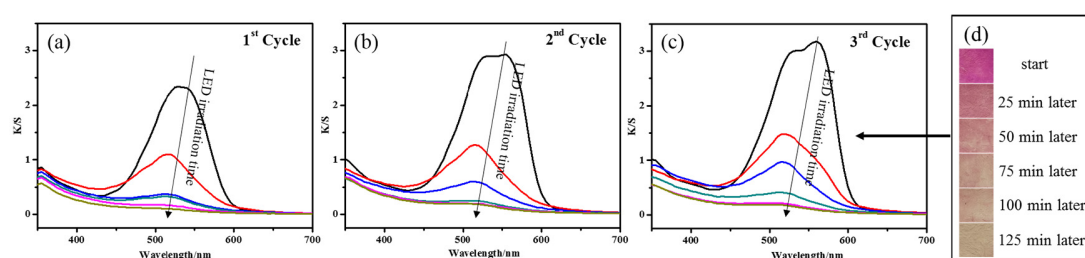

**Figure S12** (a-c) The K/S curves of S-HTO@ $\alpha$ -TiO<sub>2</sub>@f-PAN NF stained by RhB under LED irradiation for three cycles and (d) Photos of the S-HTO@ $\alpha$ -TiO<sub>2</sub>@f-PAN NF stained by RhB in the third cycle.

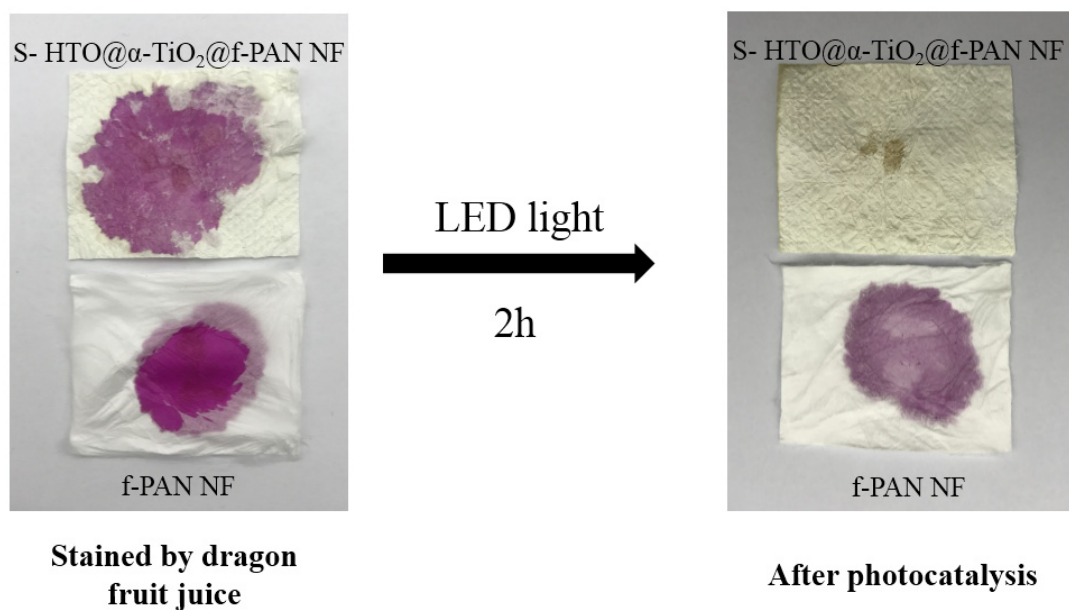

Figure S13 Photocatalytic degradation of dragon fruit juice stains.

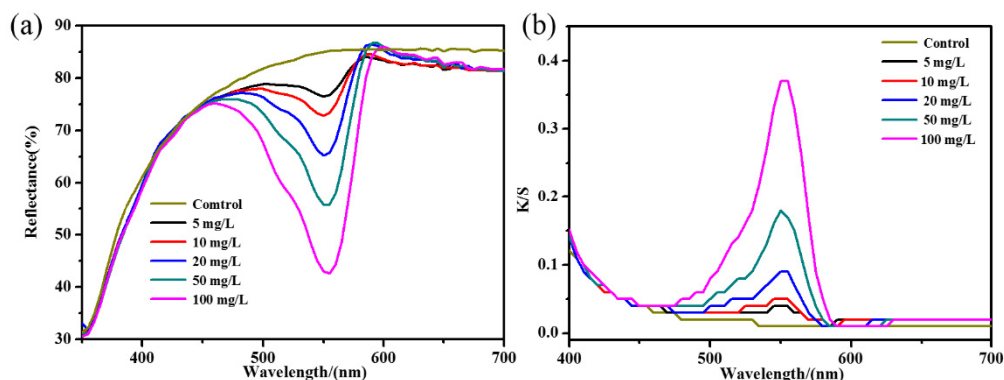

Figure S14 (a) Reflectance and (b) K/S curves of PAN fabric stained with different concentrations of RhB aqueous solution.

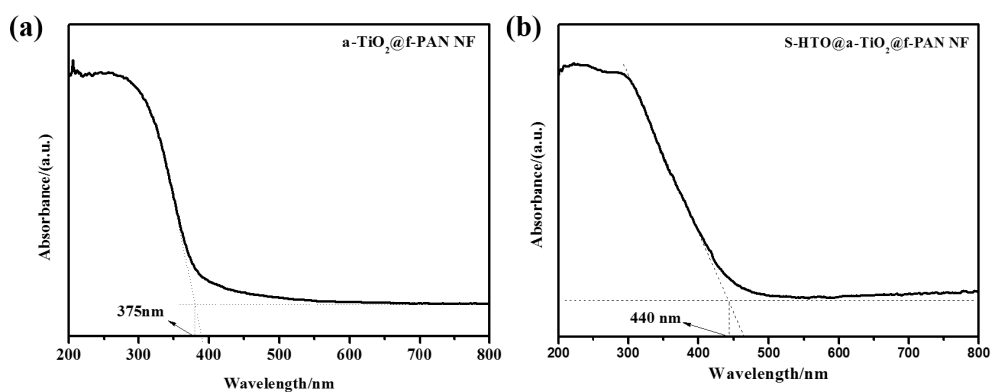

Figure S15 UV-vis-DRS of (a)  $\alpha$ -TiO<sub>2</sub>@f-PAN NF and (b) S-HTO@ $\alpha$ -TiO<sub>2</sub>@f-PAN NF.

## References

- [S1]. R. Guan, X. Yuan, Z. Wu, H. Wang, L. Jiang, J. Zhang, Y. Li, G. Zeng and D. Mo, *Chemical Engineering Journal*, 2018, 350, 573-584.
- [S2]. L. Rimoldi, D. Meroni, G. Cappelletti and S. Ardizzone, *Catalysis Today*, 2017, 281, 38-44.
- [S3]. S. Panneri, M. Thomas, P. Ganguly, B. N. Nair, A. P. Mohamed, K. G. K. Warriar and U. S. Hareesh, *Catalysis Science & Technology*, 2017, 7, 2118-2128.
